1 **Double nerve transfer to a single target muscle: experimental model in**  
2 **the upper extremity**

3 **Matthias Luft<sup>1,2</sup>, Johanna Klepetko<sup>1,2</sup>, Silvia Muceli<sup>3</sup>, Jaime Ibáñez<sup>4,5</sup>, Vlad Tereshenko<sup>1,2</sup>,**  
4 **Christopher Festin<sup>1,2</sup>, Gregor Längle<sup>1,2</sup>, Olga Politikou<sup>1,2</sup>, Udo Maierhofer<sup>1,2</sup>, Dario Farina<sup>4</sup>,**  
5 **Oskar C. Aszmann<sup>1,6</sup>, Konstantin D. Bergmeister<sup>1,2,7</sup>**

6 <sup>1</sup>Clinical Laboratory for Bionic Extremity Reconstruction, Department of Plastic, Reconstructive and  
7 Aesthetic Surgery, Medical University of Vienna, Vienna, Austria

8 <sup>2</sup>Center for Biomedical Research, Medical University of Vienna, Vienna, Austria

9 <sup>3</sup>Department of Electrical Engineering, Chalmers University of Technology, Gothenburg, Sweden

10 <sup>4</sup>Department of Bioengineering, Imperial College London, London, UK

11 <sup>5</sup>Department of Clinical and Movement Neuroscience, University College London, London, UK

12 <sup>6</sup>Department of Plastic, Reconstructive and Aesthetic Surgery, Medical University of Vienna, Vienna,  
13 Austria

14 <sup>7</sup>Karl Landsteiner University of Health Sciences, Department of Plastic, Aesthetic and Reconstructive  
15 Surgery, University Hospital St. Poelten, Krems, Austria

16

17 **\* Correspondence:**

18 Konstantin Bergmeister, MD PhD

19 Clinical Laboratory for Bionic Extremity Reconstruction,

20 Department of Plastic, Reconstructive and Aesthetic Surgery

21 Medical University of Vienna

22 Waehringer Guertel 18-20

23 A-1090 Vienna, Austria

24 [kbergmeister@gmail.com](mailto:kbergmeister@gmail.com)

25 **Keywords: nerve injury, peripheral nerve, nerve transfer, targeted muscle reinnervation, rat**  
26 **model, microsurgery**

27

28 **Abstract**

29 Surgical nerve transfers are used to efficiently treat peripheral nerve injuries, neuromas, phantom limb  
30 pain or improve bionic prosthetic control. Commonly, one donor nerve is transferred to one target  
31 muscle. However, the transfer of multiple nerves onto a single target muscle may increase the number  
32 of muscle signals for myoelectric prosthetic control and facilitate the treatment of multiple neuromas.  
33 Currently, no experimental models are available for multiple nerve transfers to a common target muscle  
34 in the upper extremity. This study describes a novel experimental model to investigate the  
35 neurophysiological effects of peripheral double nerve transfers. For this purpose, we developed a  
36 forelimb model to enable tension-free transfer of one or two donor nerves in the upper extremity.  
37 Anatomic dissections were performed to design the double nerve transfer model (n=8). In 62 male  
38 Sprague-Dawley rats the ulnar nerve of the antebrachium alone (n=30) or together with the anterior  
39 interosseus nerve (n=32) was transferred to reinnervate the long head of the biceps brachii. Before  
40 neurotization, the motor branch to the biceps' long head was transected at the motor entry point and  
41 resected up to its original branch to prevent auto-reinnervation. In all animals, coaptation of both nerves  
42 to the motor entry point could be performed tension-free. Mean duration of the procedure was  $49 \pm 13$   
43 min for the single nerve transfer and  $78 \pm 20$  min for the double nerve transfer. Twelve weeks after  
44 surgery, muscle response to neurotomy, behavioral testing, retrograde labeling and structural analyses  
45 were performed to assess reinnervation. These analyses indicated that all nerves successfully  
46 reinnervated the target muscle. No aberrant reinnervation was observed by the originally innervating  
47 nerve. Our observations suggest a minimal burden for the animal with no signs of functional deficit in  
48 daily activities or auto-mutilation in both procedures. Furthermore, standard neurophysiological  
49 analyses for nerve and muscle regeneration were applicable. This newly developed nerve transfer  
50 model allows for the reliable and standardized investigation of neural and functional changes following  
51 the transfer of multiple donor nerves to one target muscle.

52

## Double nerve transfer to a single target muscle: experimental model in the upper extremity

53

54

55

56

57

58

## 59 1 Introduction

60 Nerve transfers offer a variety of therapeutic possibilities in modern extremity reconstruction, such as  
61 treating peripheral nerve injuries, neuromas, phantom limb pain, improving prosthetic control or  
62 restoring function following spinal cord injuries (Aszmann et al., 2015;Farina et al., 2017;Dumanian  
63 et al., 2019;Van Zyl et al., 2019). Compared to conventional nerve repair modalities, nerve transfers  
64 are capable of bypassing slow peripheral nerve regeneration (Terzis and Papakonstantinou, 2000), thus  
65 preventing irreversible muscle fibrosis before reinnervation (Mackinnon and Novak, 1999). For this  
66 purpose, nearby nerves with a sufficient axonal load and lesser functional importance are neurotized  
67 and transferred to the injured nerve (Oberlin et al., 1994;Bertelli et al., 1997). Because of overall faster  
68 regeneration and better functional outcomes compared to nerve grafting, this surgical procedure has  
69 been able to improve the devastating effects of peripheral nerve and brachial plexus lesions, which  
70 have otherwise often led to long-term health impairment and subsequent socioeconomic costs  
71 (Mackinnon and Novak, 1999;Terzis and Papakonstantinou, 2000;Bergmeister et al., 2020).  
72 Additionally, they are used in a procedure termed targeted muscle reinnervation (TMR) to improve  
73 myoelectric prosthetic control (Kuiken et al., 2009;Kapelner et al., 2016), treat neuromas or phantom  
74 limb pain (Mioton et al., 2020). Here, amputated nerves within an extremity stump are transferred to  
75 residual stump muscles, thus significantly improving the recording of neural activity about motor intent  
76 and the control of myoelectric prostheses. Generally, one donor nerve is transferred to one target  
77 muscle head and this concept has been well studied with high clinical success (Kuiken et al.,  
78 2009;Aszmann et al., 2015;Farina et al., 2017). However, the use of multiple nerve transfers to a single  
79 target muscle head may provide additional benefits for these clinical indications but has not been  
80 clinically explored. Although several nerve transfer models have been established (Kuiken et al.,  
81 1995;Bergmeister et al., 2016;Aman et al., 2019), none of them has investigated multiple peripheral  
82 nerve transfers in the upper extremity. Only one model where multiple donor nerves are used to restore  
83 muscle function in the rat hindlimb has been described (Kuiken et al., 1995). However, as most nerve

84 injuries occur in the upper extremity, an upper extremity model for experimental investigation of this  
85 concept is needed (Scholz et al., 2009).

86 In this study, we propose a surgical nerve transfer model to allow the transfer of multiple donor nerves  
87 to a single muscle head and we validate this model in the rat forelimb. This model allows for reliable  
88 analyses with all standard neurophysiological investigations of the motor unit for possible  
89 implementation of this concept to clinical application.

## 90 **2 Materials and methods**

### 91 **2.1 Experimental design**

92 Eight rat cadavers were dissected to design the double nerve transfer procedure. An important criterion  
93 for the selection of the donor nerves and the target muscle was clinical relevance. First, eligible  
94 peripheral motor nerves were determined for a reliable, tension-free transfer to the long head of the  
95 biceps muscle. Then, the topographical relationships between the biceps' long head, its motor nerve  
96 branch, the ulnar nerve in the antebrachium (UN) and the anterior interosseus nerve (AIN) were studied  
97 and subsequently compared to the human anatomy. These studies verified the anatomical feasibility of  
98 transferring both the distal UN and AIN to the long head of the biceps.

99 Sixty-two Sprague-Dawley rats aged 8-10 weeks were randomly allocated into two groups by an  
100 animal care taker to investigate functional and structural changes following single (SNT) and double  
101 nerve transfer (DNT). Thirty-two animals were assigned to the DNT group (Figure 1), while 30 animals  
102 underwent the single nerve transfer of the UN and were used as control (Figure 1). Twelve weeks after  
103 surgery, microscopic inspection of the motor entry point (n=62), nerve crush and neurotomy (n=32),  
104 and Terzis' grooming test (n=51) (Inciong et al., 2000) were performed. After the final functional  
105 assessments, muscle specimens were harvested and weighed (n=32). Thirty-eight animals were  
106 assigned for retrograde labeling analyses. Sample size calculations performed by a biostatistician were

## Double nerve transfer to a single target muscle: experimental model in the upper extremity

107 considered in the planning of the studies. Planning, conducting and reporting of experiments were  
108 performed according to the ARRIVE (Animal Research: Reporting of In Vivo Experiments) guidelines  
109 (Percie Du Sert et al., 2020). The protocols for these experiments were approved by the ethics  
110 committee of the Medical University of Vienna and the Austrian Ministry for Research and Science  
111 (reference number BMBWF- 66.009/0413-V/3b/2019) and strictly followed the principles of  
112 laboratory animal care as recommended by the Federation of European Laboratory Animal Science  
113 Associations (FELASA)(Guillen, 2012).

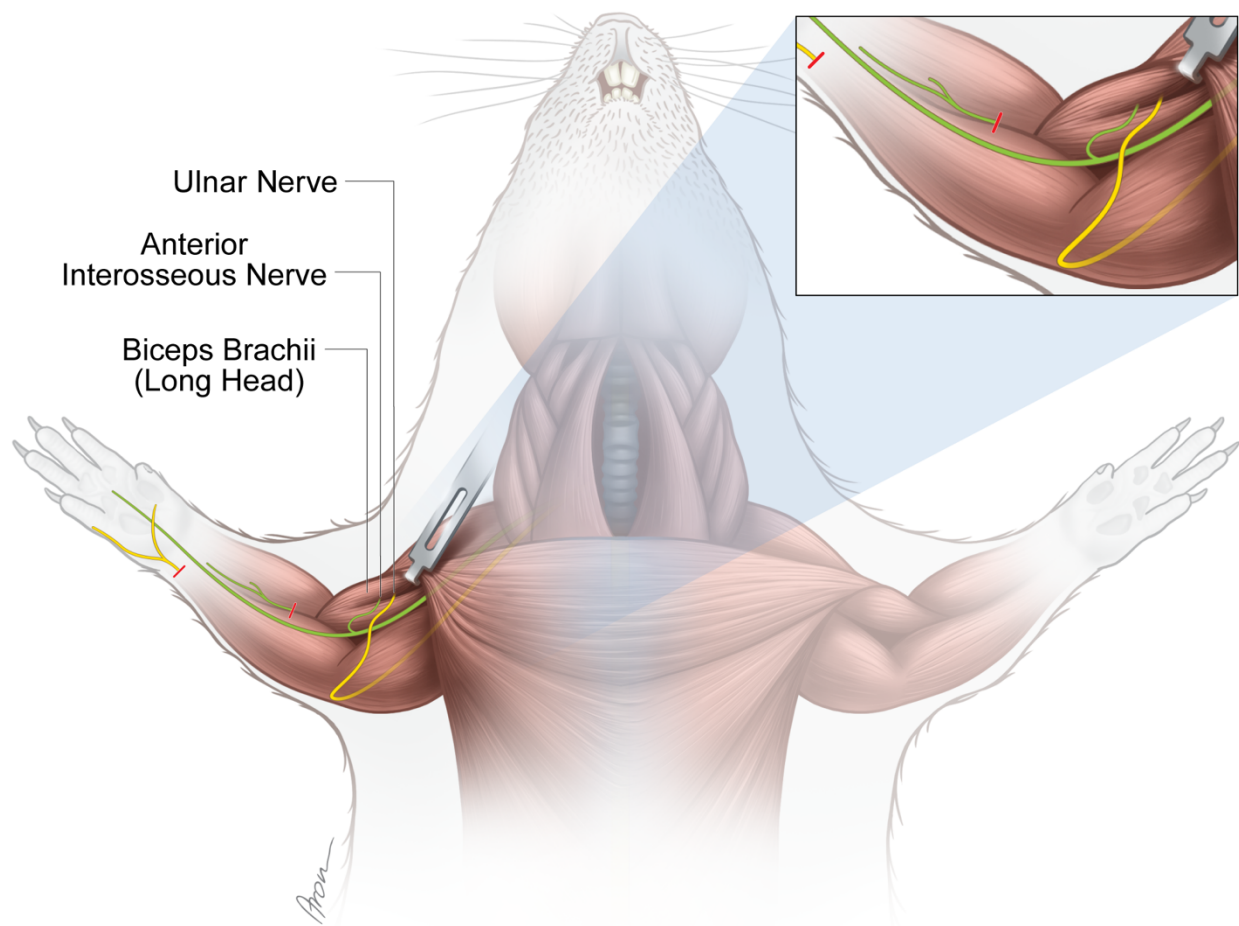

114

115 **Figure 1. Experimental nerve transfer models.** *Single-nerve transfer model:* The UN (yellow) was transected distally to  
116 the palmar cutaneous branch in the forearm and surgically transferred to reinnervate the long head of the biceps (n=30).  
117 *Multiple-nerve transfer model:* Both the UN (yellow) and AIN (green) were redirected to reinnervate the long head of the  
118 biceps (n=32). Before both nerve transfer procedures, the originally innervating branch of the MCN was removed. The

119 untreated contralateral biceps muscles served as internal control for both groups. The red lines indicate the level of  
120 transection. Credit: Aron Cserveny.

## 121 **2.2 Nerve transfer model**

122 For each procedure, anesthesia was induced with ketamine (100 mg/kg) and xylazine (5 mg/kg)  
123 intraperitoneally and maintained by volume-controlled ventilation (40% O<sub>2</sub>, room air, 1.5-2%  
124 isoflurane) following orotracheal intubation. Piritramide (0.3 mg/kg) was administered subcutaneously  
125 for analgesia. Furthermore, the drinking water was mixed with piritramide and glucose (30 mg  
126 piritramide and 30 ml 10% glucose dissolved in 250 ml drinking water) and administered ad libitum  
127 for pain relief during the first seven postoperative days. After the experimental tests, animals were  
128 euthanized with a lethal dose of pentobarbital (300 mg/kg) injected intracardially under deep  
129 anesthesia. All animals were examined daily by an animal keeper for pain, sensory deficits,  
130 impairments in daily activities, wound dehiscence and infection. All nerve transfer procedures were  
131 performed by the same surgeon and assistant.

### 132 **2.2.1 Single nerve transfer**

133 A lazy S-shaped incision was made from 5 mm caudal to the greater tubercle of the humerus over the  
134 medial epicondyle along the ulnar side of the forearm until 5 mm proximal to the forepaw (Figure 2A).  
135 Following the dissection of the subcutaneous tissue, the antebrachial fascia was opened through an  
136 incision placed over the palmaris longus muscle to preserve the underlying ulnar collateral vessels.  
137 Then, the flexor carpi ulnaris muscle was bluntly mobilized and retracted ulnarly using a Magnetic  
138 Fixator Retraction System (Fine Science Tools, Heidelberg, Germany) to expose the UN. Further  
139 exposure of the dorsal and palmar cutaneous branches of the UN was carried out using an operating  
140 microscope (Carl Zeiss, Munich, Germany) (Figure 2B). The palmar branch was cut right after its  
141 emergence and the UN was subsequently transected as distally as possible. The UN was dissected  
142 proximally to its distal exit from the cubital tunnel while preserving the ulnar artery and basilic vein.

143 Intraneural dissection allowed for conservation of the dorsal cutaneous and flexor carpi ulnaris motor  
144 branches (Figure 2B), while facilitating a tension-free nerve coaptation. Next, the incision of the  
145 antebrachial fascia was extended proximally to open the brachial fascia above the cubital fossa and  
146 biceps. Subsequently, the pectoral muscles were retracted to expose the musculocutaneous nerve's  
147 (MCN) branch to the long head of the biceps running along the bicipital groove (Figure 2C). The motor  
148 branch of the MCN to the biceps' long head was then cut at the motor insertion point and the proximal  
149 segment subsequently removed from its division to prevent spontaneous regeneration. Next, the UN  
150 was routed proximally over the cubital fossa and coapted tension-free to the epimysium near the  
151 original motor insertion point with one 11-0 (Ethilon, Ethicon, Johnson & Johnson Medical Care, USA)  
152 simple interrupted stitch (Figure 2D).



# Double nerve transfer to a single target muscle: experimental model in the upper extremity

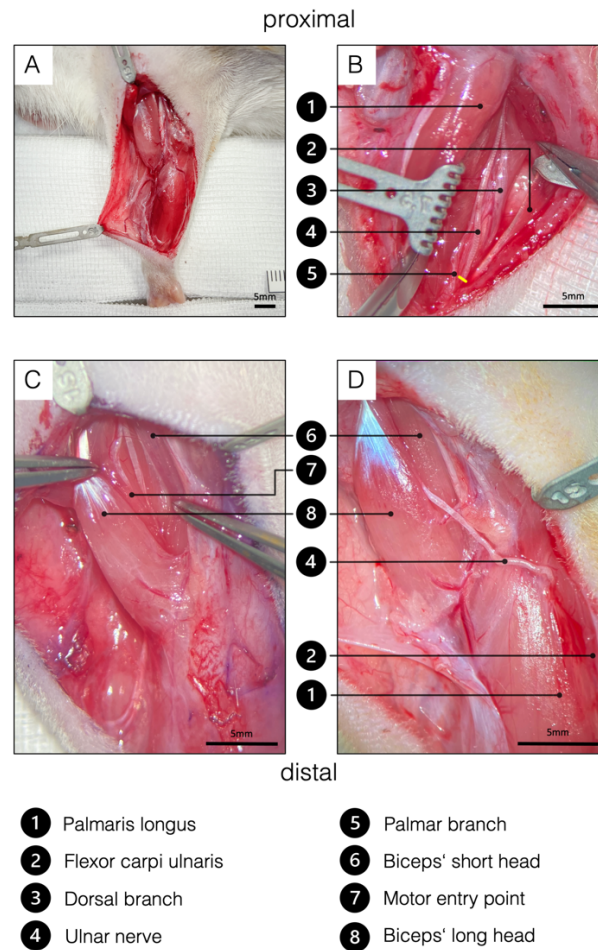

153

154 **Figure 2. Surgical procedure of the ulnar nerve transfer.** (A) Overview of the rats' supinated right forelimb after the  
155 brachial and antebrachial fascia were removed. (B) Two blunt retractors have been placed to pull the flexor carpi ulnaris  
156 and the palmaris longus apart, revealing the underlying UN. The yellow line indicates the level of transection to gain  
157 sufficient length to reach the biceps' long head tension-free. To achieve this, the palmar cutaneous branch must be  
158 transected, while the dorsal cutaneous branch can be preserved. (C) For better visualization, the brachial fascia was opened  
159 above the biceps. A sharp retractor was placed to pull back the pectoral muscles and thus revealed the two biceps heads,  
160 which were bluntly separated. In the deep bicipital groove, the MCN and its motor branch to the long head of the biceps  
161 were identified. Maximum length of the motor branch to the long head was removed to prevent spontaneous regeneration.  
162 (D) Eventually, the UN was rerouted from between the palmaris longus and flexor carpi ulnaris to the long head of the  
163 biceps and sutured to the epimysium at the former original motor entry point. This procedure on the one hand spares the  
164 denervation of the flexor carpi ulnaris and the flexor digitorum superficialis and the invasive dissection through the cubital  
165 tunnel.

## 166 **2.2.2 Double nerve transfer**

167 The skin incision, exposure of the distal UN as well as the denervation of the biceps' long head were  
168 performed as described in the single nerve transfer. Before coaptation of the UN, the median nerve and  
169 AIN were dissected. For better exposure of the AIN, one blunt retractor was carefully placed to pull  
170 the proximal belly of the pronator teres muscle ulnarly (Figure 3A). After identifying the AIN, it was  
171 transected and dissected proximally in an intraneural fashion to its branching point (Figure 3A). Then,  
172 both the UN and the AIN were neurotized to the epimysium near the original motor insertion point  
173 with one 11-0 (Ethilon, Ethicon, Johnson & Johnson Medical Care) simple interrupted stitch each  
174 (Figure 3B). Significant caliber differences between the motor branch of the biceps' long head and the  
175 two transferred nerves required neurotization directly to the epimysium. In this way, the regeneration  
176 distance was kept as short as possible, hence minimizing the reinnervation time. It is particularly  
177 important not to place the two nerves in direct proximity in the tissue (Figure 3B) as this increases the  
178 complexity of the dissection and therefore the risk of injuring the nerves in the follow-up examinations.  
179 Wound closure was performed with fascial and deep dermal 6-0 (Vicryl, Ethicon, Johnson and Johnson  
180 Medical Care, Austria) simple interrupted sutures followed by running subcuticular suture with 6-0  
181 (Vicryl, Ethicon, Johnson and Johnson Medical Care, Austria).

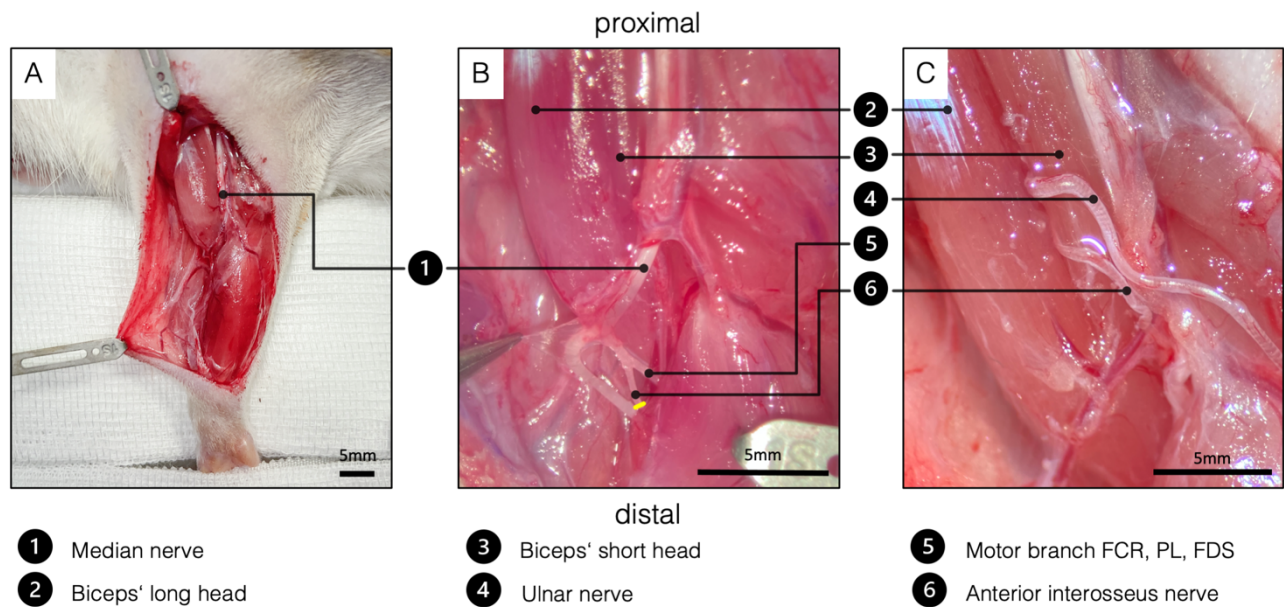

182

183 **Figure 3. Surgical procedure of the double nerve transfer.** (A) General view of the right supinated forelimb. The  
184 proximal hook pulls the pectoral muscles towards proximal for better presentation. (B) The brachial and antebrachial fascia  
185 and the motor branch to the pronator teres muscle were removed for better visualization. In the cubital fossa, three branches  
186 arise from the median nerve: one muscle branch supplying the pronator teres (resected), one muscle branch supplying the  
187 flexor carpi radialis, palmaris longus and flexor digitorum superficialis and the AIN supplying pronator quadratus, flexor  
188 pollicis longus and flexor digitorum profundus. After transecting the AIN (yellow line), proximal dissection in an  
189 intraneural fashion gains sufficient length to reach the biceps' motor entry point. (C) Surgical site before wound closure,  
190 after both the UN and the AIN were transferred to the physiological motor entry point of the long head of the biceps. (FCR  
191 - flexor carpi radialis. PL - palmaris longus. FDS - flexor digitorum superficialis).

### 192 2.3 Behavioral evaluation

193 Quantitative assessment of grooming behavior was carried out and filmed twelve weeks after the single  
194 (n=21) and double nerve transfer (n=30) using Terzis' grooming test (Inciong et al., 2000), a  
195 modification of Bertelli's grooming test (Bertelli and Mira, 1993). To keep the animals' stress level at  
196 a minimum, testing was performed in the animals' familiar environment. In brief, 1 to 3 ml of water  
197 was sprinkled on the rats' snouts, which led to consistent bilateral grooming movements of the  
198 forelimbs. Grading of the grooming performance was assessed by the following score: grade 1, paws

199 reach mouth or elbow is extended; grade 2, paws reach mouth and beneath eyes; grade 3, paws reach  
200 eyes; grade 4, paws reach between eyes and ears; grade 5, paws reach behind the ears. The slow-motion  
201 video sequences were graded by a blinded observer.

## 202 **2.4 Retrograde labeling**

203 Assessment of the motor unit at the spinal cord level after nerve transfer surgery was performed via  
204 retrograde labeling as previously described (Hayashi et al., 2007). In brief, retrograde tracers are taken  
205 up by terminal axons and transported via retrograde axonal transport to label the cell somas in the  
206 spinal cords' ventral root. In eight additional untreated control animals both the UN in the antebrachium  
207 and the AIN were transected and placed into conduit reservoirs for one hour, either filled with 5  $\mu$ l of  
208 10% Fluoro-Ruby (Invitrogen, Carlsbad, CA, USA) or 5  $\mu$ l of 2% Fast-Blue (Polysciences,  
209 Warrington, PA, USA). Tracer leakage was prevented by sealing the reservoir around the nerve with  
210 Vaseline (Vaselinum album, Fagron, Glinde, Germany). Hence, the corresponding motor neuron pools  
211 in the spinal cord (C8-Th1) were localized (Figure 4). To further prevent bias due to differences in  
212 penetration of the tracers, the nerves were alternately colored with Fluoro-Ruby and Fast-Blue.  
213 Additionally, twelve weeks following the SNT (n=15) and DNT (n=15) surgery, motor neurons  
214 reinnervating the long head of the biceps were studied. Through a 15mm incision above the biceps, the  
215 biceps' long head and its insertion site were exposed. A Hamilton micro syringe was then used to inject  
216 10 $\mu$ l 2% Fluoro-Gold (Fluorochrome, LLC, Denver, CO) evenly into the biceps' long head near the  
217 motor insertion site. After tracer injection with a small gauge needle, the syringe was kept inside the  
218 muscle for one minute before slowly withdrawing it to keep leakage to a minimum. Seven days  
219 following retrograde labeling, the animals were deeply anesthetized by a lethal dose of xylazine,  
220 ketamine and pentobarbital intraperitoneally before the left ventricle was perfused with 400ml of 0.9%  
221 NaCl followed by 400ml of 4% paraformaldehyde (PFA) solution. Then, the spinal cord segments C4-  
222 Th2 were harvested and stored in 4% PFA for 24 hours at +4 $^{\circ}$ , followed by 24h in 0.1M phosphate

## Double nerve transfer to a single target muscle: experimental model in the upper extremity

223 buffered saline PBS at +4°. Then, the specimens were dehydrated in a PBS solution with increasing  
224 sucrose concentrations of 10%, 25% and 40% for 24 hours each before embedding them in Tissue-  
225 Tek® O.C.T.™ Compound (Sakura Finetek Europe B.V., Alphen aan den Rijn, Netherlands). Spinal  
226 cord segments were cut longitudinally into 40- $\mu$ m sections using a cryostat (Leica, Germany). To  
227 assess the reinnervation, each spinal cord section was analyzed in an observer blinded setting using a  
228 fluorescence microscope (Carl Zeiss, Munich, Germany). Spinal cord segments of labeled motor  
229 neurons after DNT (Fluoro-Gold) were compared to the double labeled (Fast-Blue, Fluoro-Ruby)  
230 segments of the untreated animals.

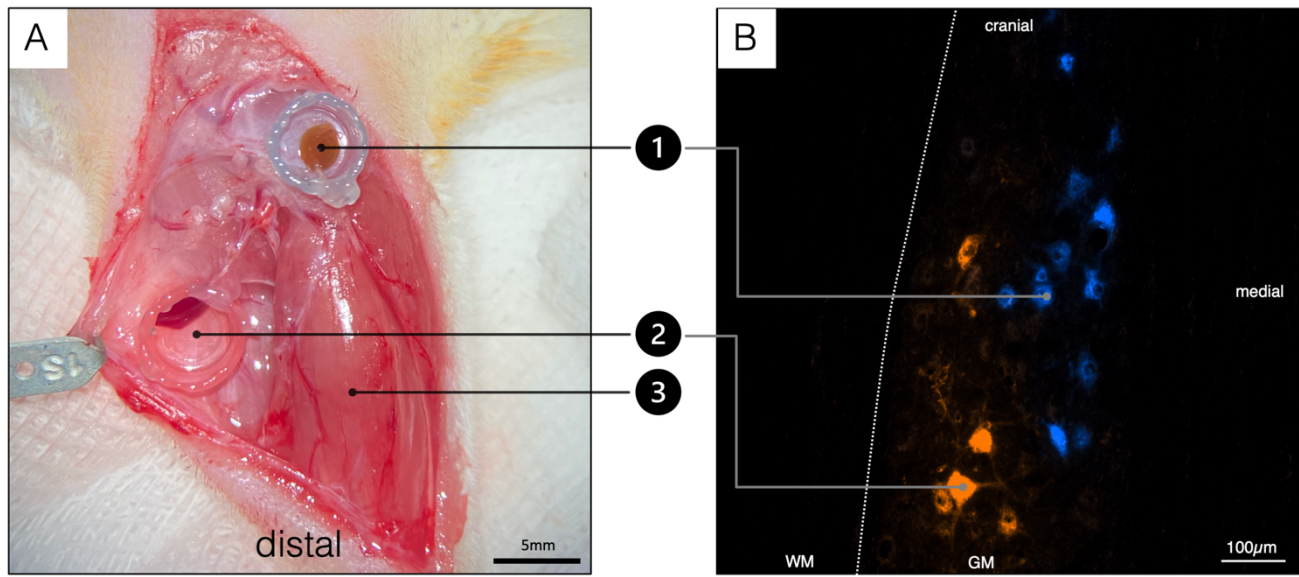

231 ① Ulnar nerve, Fast Blue ② Anterior interosseus nerve, Fluoro-Ruby ③ Palmaris longus

232 **Figure 4. Double retrograde labeling.** (A) The selected donor nerves were both dissected in a right forelimb and placed  
233 in a conduit reservoir filled with Fast-Blue (UN) and Fluoro-Ruby (AIN) respectively for one hour. Wet sterile swabs were  
234 placed above the surgical site to prevent the tissue from drying and the fluorescent dyes from bleaching.  
235 (B) Spinal cord section C8-Th1. Labeled AIN (orange) and UN motoneuron pool (blue).  
236 WM – white matter, GM – grey matter.

### 237 2.5 Neuromuscular analyses

238 The lengths of both the UN (n=6) and AIN (n=6) were measured intraoperatively before coaptation to  
239 the muscle. Twelve weeks following surgery, the motor entry point was microscopically examined for



240 proper reinnervation and neuroma formation in all animals. Muscle reaction to nerve crush (see Video  
241 2 for muscle reaction to MCN crush in the control side) and neurotomy was assessed in animals  
242 following DNT (n=17) and compared to animals following SNT (n=15). For internal control, the motor  
243 branches to the biceps' long head were crushed and neurotomized in the contralateral forelimbs.  
244 Conclusively, to assess neuromuscular regeneration after denervation, the biceps muscles were  
245 resected and weighed immediately after removal using a microscale.

## 246 **2.6 Statistical analysis**

247 An ANCOVA was conducted to determine effects of the nerve transfer procedure (SNT and DNT) on  
248 the reinnervated muscle mass after adjusting for control muscle mass. In addition, a paired-samples t-  
249 test was used to determine whether there was a change of muscle mass following SNT or DNT between  
250 the two sides. All data analyses were performed using SPSS Statistics for Macintosh, Version 25.0  
251 (IBM, Armonk, New York, USA).

## 252 **3 Results**

### 253 **3.1 Nerve transfer surgery**

254 All animals survived the surgical nerve transfers and showed normal gait and grasping behavior in the  
255 twelve-week follow-up period. All animals were able to carry out activities of daily behavior  
256 unhindered and no signs of severe pain, wound dehiscence, auto-mutilation or infection were  
257 documented. Mean surgery time was  $49 \pm 13$  min for the SNT procedures and  $78 \pm 20$  min for the DNT  
258 procedures.

### 259 **3.2 Behavioral evaluation**

260 Slow motion video sequence analysis by a blinded evaluator showed that twelve weeks following the  
261 SNT and DNT, all animals could consistently reach behind their ears and therefore achieved a  
262 maximum score of 5 (Video 1).

### 263 **3.3 Retrograde Labeling**

264 Analyses of the spinal cord following UN transfer showed adequate motor neuron staining in the  
265 corresponding segments (Th1-C8). When comparing the spinal cords of the untreated animals with  
266 spinal cords of animals which underwent DNT, the distribution pattern of the longitudinally arranged  
267 Fluoro-Gold dyed clusters provides strong evidence that both the UN and AIN innervated the biceps'  
268 long head (see Figure 4 for a representative example). Furthermore, no signs of spontaneous  
269 regeneration from the MCN were noted by analyzing the corresponding spinal cord segments (C5-C7).

### 270 **3.4 Neuromuscular analyses**

271 Both the donor nerve branches, and biceps' motor entry point were topographically consistent. The UN  
272 measured a mean length of  $23.08 \pm 1.36$  mm from the distal exit of the cubital tunnel to the distal  
273 stump. The AIN transfer provided a mean length of  $10.50 \pm 1.61$  mm measured from its branching off  
274 the median nerve to the distal stump.

275 Twelve weeks following nerve transfer surgeries, macroscopic examination of all biceps motor entry  
276 points showed successful reinnervation but no auto-innervation by the MCN and no signs of neuroma  
277 were detected. Adequate muscle fibrillation was observed in all animals upon crushing and  
278 neurotomizing the donor nerves individually following SNT and DNT (UN crush and AIN crush  
279 response is shown in video 3 and 4 respectively).

#### 280 **3.4.1 Comparison of reinnervated muscle mass**

281 There was a linear relationship between treated and untreated muscle mass for each nerve transfer  
282 procedure, as assessed by visual inspection of a scatterplot. There was homogeneity of regression

283 slopes as the interaction term was not statistically significant,  $F(1, 28) = .238, p = .630$ . Standardized  
284 residuals for the interventions and for the overall model were normally distributed, as assessed by  
285 Shapiro-Wilk's test ( $p > .05$ ). There was homoscedasticity and homogeneity of variances, as assessed  
286 by visual inspection of a scatterplot and Levene's test of homogeneity of variance ( $p = .504$ ),  
287 respectively. There were no outliers in the data, as no cases were detected with standardized residuals  
288 greater than  $\pm 3$  standard deviations.

289 After adjustment for control muscle mass, there was a statistically significant difference in muscle mass  
290 between the treated sides following SNT and DNT,  $F(1, 29) = 24.030, ***p < .001$ , partial  $\eta^2 = .453$ .  
291 Muscle mass was statistically significantly larger in the DNT group ( $303.01 \pm 7.76$  mg) compared to  
292 the SNT group ( $245.57 \pm 8.29$  mg), with a mean difference of 57.45 (95% CI, 33.48 to 81.41)  
293 mg,  $***p < .001$ . Data are reported adjusted mean  $\pm$  standard error.

#### 294 **3.4.2 Comparison of reinnervated and control muscle mass**

295 No outliers were detected as assessed by inspection of a boxplot. The assumption of normality was not  
296 violated, as assessed by Shapiro-Wilk's test for the SNT ( $p = .758$ ) and DNT group ( $p = .307$ ).

297 The mean muscle mass was reduced following SNT ( $235.07 \pm 44.05$  mg) as opposed to the untreated  
298 contralateral side ( $292.93 \pm 35.17$  mg) with a statistically significant decrease of -57.87 (95% CI, -  
299 77.38 to -38.35) mg,  $t(14) = -6.360, ***p < .001, d = 1.64$ . However, mean muscle mass following  
300 DNT ( $312.28 \pm 37.74$  mg) compared to the untreated contralateral side ( $315.97 \pm 28.22$  mg) was similar  
301 and showed no statistically significant change ( $p = .571$ ). Data are reported as mean  $\pm$  standard  
302 deviation.

## 303 **4 Discussion**

304 The present study provides a robust and easily accessible model for surgical double nerve transfers to  
305 a single target muscle in the rat's upper extremity. We offer detailed step-by-step instructions on how  
306 to reproduce this model, including potential pitfalls. For comparison, the model also offers a



## Double nerve transfer to a single target muscle: experimental model in the upper extremity

307 description of a single nerve transfer to the same target muscle. We employed nerve crush, neurotomy,  
308 behavioral analysis and retrograde labeling which indicated that neuromuscular regeneration of two  
309 donor nerves occurred into one target muscle.

310 To our knowledge, only one rat model for multiple peripheral innervation of a single target has been  
311 described. However, that previous model was for the lower extremity and did not provide detailed  
312 description for step by step reproduction of the model (Kuiken et al., 1995). Hindlimb models do not  
313 adequately represent the physiology of upper extremity nerve transfers and targeted muscle  
314 reinnervation procedures. This notion is supported by the clinical discrepancy between the excellent  
315 outcomes for upper extremity compared to the poor outcomes for lower extremity nerve transfers (Ray  
316 et al., 2016). Furthermore, most nerve transfers are currently conducted in the upper extremity for both  
317 nerve reconstruction and prosthetic control. We already established single peripheral nerve transfer  
318 models in the upper extremity (Bergmeister et al., 2016; Aman et al., 2019), which were considered for  
319 developing this novel model. For this purpose, we conducted anatomical dissections in eight rat  
320 cadavers to design the DNT concept to allow tension-free approximation of the two motor nerves to  
321 the target biceps muscle. Theoretically, many other target muscles are also feasible due to the sufficient  
322 length of both the UN and AIN. However, the biceps muscle provides an optimal target that is  
323 accessible for all standard structural and functional analyses and accurately represents a surgical target  
324 in clinical nerve transfer scenarios as well.

325 The implementation of this model requires an operating microscope, a set of microsurgery tools and  
326 advanced microsurgical skills to achieve reproducible results. In our experience, dissection of the UN  
327 in the antebrachium can be performed in a straightforward manner and preservation of the motor branch  
328 to the flexor carpi ulnaris muscle, the dorsal sensory branch and the ulnar artery is easily feasible.  
329 Subsequently, transecting the UN as distally as possible allows for tension-free coaptation to the  
330 proximal target muscle. Exposure of the MCN's motor branch to the long head of the biceps is best  
331 achieved in the bicipital groove by retracting the overlaying pectoral muscles medially. Here,

332 considerable care must be taken when dividing the two bicep heads to preserve the bicipital artery,  
333 which enters the long head in the distal portion and advances in proximal direction. Injury to this vessel  
334 has shown to affect functional measures in previous experiments. Another hazard in the DNT model is  
335 potential injury of the median vessels in the cubital fossa. To prevent this scenario, special attention is  
336 required during the dissection of the median nerve, because the median vessels are either found directly  
337 beneath or above the nerve. It is mandatory to dissect the AIN intraneurally to its proximal branching  
338 point to enable tension-free coaptation to the original motor point of the biceps. Due to the target to  
339 donor nerve diameter discrepancies, we chose to suture the donor nerves to the motor entry point  
340 epimysially. In previous models, this approach led to reliable reinnervation of the target muscle  
341 (Bergmeister et al., 2019).

342 Our behavioral observations indicate that the procedures did not cause extraordinary distress or pain  
343 under adequate analgesia postoperatively. As early as one week after surgery, behavioral testing was  
344 carried out in randomly selected individual animals, and all of them achieved the maximum score.  
345 Likewise, after a 12-week regeneration period, all animals from both the control and the experimental  
346 DNT group achieved the maximum score of Terzis grooming test (Inciong et al., 2000) (Video 1).  
347 Hence, it seems that two motor nerves of different origin governing the same muscle did not hamper  
348 activities of daily living. Additionally, no substantial pain or neuroma pain was evident. When  
349 comparing the two procedures, it takes only marginally longer to perform the DNT, while no additional  
350 physical stress or motor deficits were observed postoperatively.

351 The donor nerves reinnervated the target muscle within 12 weeks in all animals as indicated  
352 macroscopically during dissection and by the fact that nerve crush or neurotomy induced fasciculations  
353 of the muscle (Videos 3 and 4). Likewise, intramuscular retrograde labeling showed the uptake and  
354 transport of tracer dye into the motor neuron columns of the two transferred nerves.

355 Interestingly, after 12 weeks, muscle mass of the UN reinnervated muscles only recovered to 80.25 %  
356 of the contralateral side. This is in contrast with previous studies performed by authors of this work

357 (Bergmeister et al., 2019). A possible explanation for this mismatch is the difference of the levels at  
358 which the UN was cut and transferred in the two studies. Unlike in the previous study where the entire  
359 UN was transferred, here the UN was transferred at the wrist level. This may have caused that the  
360 donor nerve was not able to fully regenerate the long head of the biceps due to the lower motor axon  
361 numbers. Detailed analyses exist for humans, where the UN at wrist level only contains  $1226 \pm 243$   
362 motor axons compared to the entire UN ( $2670 \pm 347$ ) whereas the MCN contains  $1601 \pm 164$   
363 (Gesslbauer et al., 2017). Considering that the muscle mass of double reinnervated muscles regenerated  
364 to 98.83%, it appears that the two donor nerves were better able to reinnervate and adequately restore  
365 24.72 % more muscle mass than the SNT. This additionally indicates that both SNT and DNT  
366 procedures were successful and that DNT with a high axonal load may lead to higher muscle  
367 reinnervation and functional regeneration.

368 Previous findings (Bergmeister et al., 2019) reported neuroma formation at the insertion point  
369 following nerve transfer. These consisted presumably mainly of sensory axons and the surplus of motor  
370 neurons which was not able to innervate motor endplates. We did not observe neuroma formation in  
371 this study and believe, that this is because the donor nerves comprised only few sensory axons and the  
372 donor-to-recipient ratio of motor axons and targets was more balanced than in the previous study, as  
373 mentioned above. Therefore, we assume that no fibers were lost at the insertion site to the muscle,  
374 which may have formed a neuroma. Although the question of the optimal donor-to-recipient ratio for  
375 optimal outcome remains unsolved, further investigations in this surgical model are ongoing to answer  
376 this question and contribute to surgical refinement of nerve transfers.

377 One potential limitation of this study is the use of the mixed UN containing both sensory and motor  
378 nerve fibers. For better outcomes of surgical nerve transfers, “pure” motor nerves should be preferred,  
379 such as the AIN used here, to avoid sensory to motor axon incongruence (Ray et al., 2016). We decided  
380 to transfer the UN at a level, where it also contains sensory fibers of the superficial branch because  
381 unlike in human, intraneural fascicular dissection to identify the two branches proximal to Guyon’s

382 canal is impossible due to intermingling axons at the level of Guyon's canal. Uncomplicated dissection,  
383 significant transfer leeway and the lack of a better alternatives made the UN the best option.

384 The presented nerve transfer model finds broad application in many research fields. It offers the  
385 possibility to investigate basic neurophysiology, but also clinical applications of surgical nerve  
386 transfers for biological reconstruction and bionic reconstruction via targeted muscle reinnervation.  
387 After amputation, targeted muscle reinnervation can create additional myosignals to improve basic  
388 prosthetic control. In TMR, neuromas within the stump are cut and the healthy fascicles are then  
389 transferred to intact muscle segments, after denervation from their original innervation. EMG  
390 technology can record and decipher neuronal signals from those reinnervated areas into signals for  
391 prosthetic movement (Bergmeister et al., 2017;Muceli et al., 2019b;Salminger et al., 2019). The biceps'  
392 long head is suitable to perform various EMG examinations, as we have previously shown  
393 (Bergmeister et al., 2019;Muceli et al., 2019a). Especially with novel multichannel EMG technology  
394 (Muceli et al., 2015), individual motor unit action potentials can potentially be decoded from such  
395 signals as we have previously shown in SNT models (Muceli et al., 2019a).

396 In conclusion, this study demonstrated that a single target muscle can host two separate donor nerves.  
397 Our results suggest that both the SNT and DNT models are suitable for common neurophysiological  
398 examinations in peripheral nerve research. The concept of transferring multiple nerves to a single target  
399 may improve muscle reinnervation, prosthetic interfacing, neuroma therapy or facilitate phantom limb  
400 pain management. Until first clinical applications can be translated, further research is needed to fully  
401 understand the neurophysiological changes following multiple nerve transfers.

## 402 **5 Conflict of Interest**

403 All authors declare that they have no competing interest. The ERC had no influence on the study.

## 404 **6 Author Contributions**

405 Conception and design: ML, JK, SM, JI, VT, CF, GL, OP, UM, DF, OCA and KDB. Analyses and  
406 interpretation of data: ML, JK, SM, JI, VT, CF, GL, OP, UM, DF, OCA and KDB. Drafting of the  
407 article: ML, SM, DF, OCA, and KDB. Critical revision for important intellectual content and final  
408 approval of the version to be published: all authors.

## 409 **7 Funding**

410 This project has received funding from the European Research Council (ERC) under the European  
411 Union's Horizon 2020 research and innovation program (grant agreement No 810346).

## 412 **8 Abbreviations**

|     |     |                               |
|-----|-----|-------------------------------|
| 413 | AIN | Anterior interosseus nerve    |
| 414 | DNT | Double nerve transfer         |
| 415 | EMG | Electromyography              |
| 416 | MCN | Musculocutaneous nerve        |
| 417 | SNT | Single nerve transfer         |
| 418 | TMR | Targeted muscle reinnervation |
| 419 | UN  | Ulnar nerve                   |

## 420 **9 Acknowledgments**

421 We thank AM. Willensdorfer for her continuous technical assistance and A. Cserveny for his admirable  
422 illustrations in this project. In addition, we thank Florian Frommlet for his statistical analyses and  
423 expertise as a biostatistician.

## 424 **10 Data availability**

425 The following dataset was generated:

426 Luft et al. (2021), Muscle mass of the long head of the biceps following single and double nerve  
427 transfer, Dryad, Dataset, <https://doi.org/10.5061/dryad.3j9kd51jb>

428

## 429 **11 References**

- 430 Aman, M., Sporer, M., Bergmeister, K., and Aszmann, O. (2019). Experimentelle Modelle für  
431 selektive Nerventransfers der oberen Extremität: Modellbeschreibung und  
432 neurophysiologische Effekte. *Handchirurgie · Mikrochirurgie · Plastische Chirurgie* 51, 319-  
433 326.
- 434 Aszmann, O.C., Roche, A.D., Salminger, S., Paternostro-Sluga, T., Herceg, M., Sturma, A., Hofer,  
435 C., and Farina, D. (2015). Bionic reconstruction to restore hand function after brachial plexus  
436 injury: a case series of three patients. *Lancet* 385, 2183-2189.
- 437 Bergmeister, K.D., Aman, M., Muceli, S., Vujaklija, I., Manzano-Szalai, K., Unger, E., Byrne, R.A.,  
438 Scheinecker, C., Riedl, O., Salminger, S., Frommlet, F., Borschel, G.H., Farina, D., and  
439 Aszmann, O.C. (2019). Peripheral nerve transfers change target muscle structure and  
440 function. *Sci Adv* 5, eaau2956.
- 441 Bergmeister, K.D., Aman, M., Riedl, O., Manzano-Szalai, K., Sporer, M.E., Salminger, S., and  
442 Aszmann, O.C. (2016). Experimental nerve transfer model in the rat forelimb. *European*  
443 *Surgery* 48, 334-341.
- 444 Bergmeister, K.D., Große-Hartlage, L., Daeschler, S.C., Rhodius, P., Böcker, A., Beyersdorff, M.,  
445 Kern, A.O., Kneser, U., and Harhaus, L. (2020). Acute and long-term costs of 268 peripheral  
446 nerve injuries in the upper extremity. *PLOS ONE* 15, e0229530.
- 447 Bergmeister, K.D., Vujaklija, I., Muceli, S., Sturma, A., Hruby, L.A., Prahm, C., Riedl, O.,  
448 Salminger, S., Manzano-Szalai, K., Aman, M., Russold, M.-F., Hofer, C., Principe, J., Farina,  
449 D., and Aszmann, O.C. (2017). Broadband Prosthetic Interfaces: Combining Nerve Transfers  
450 and Implantable Multichannel EMG Technology to Decode Spinal Motor Neuron Activity.  
451 *Frontiers in Neuroscience* 11.
- 452 Bertelli, J.A., and Mira, J.C. (1993). Behavioral evaluating methods in the objective clinical  
453 assessment of motor function after experimental brachial plexus reconstruction in the rat. *J*  
454 *Neurosci Methods* 46, 203-208.

- 455 Bertelli, J.A., Mira, J.C., Pecot-Dechavassine, M., and Sebillé, A. (1997). Selective motor  
456 hyperreinnervation using motor rootlet transfer: an experimental study in rat brachial plexus.  
457 *J Neurosurg* 87, 79-84.
- 458 Dumanian, G.A., Potter, B.K., Mioton, L.M., Ko, J.H., Cheesborough, J.E., Souza, J.M., Ertl, W.J.,  
459 Tintle, S.M., Nanos, G.P., Valerio, I.L., Kuiken, T.A., Apkarian, A.V., Porter, K., and Jordan,  
460 S.W. (2019). Targeted Muscle Reinnervation Treats Neuroma and Phantom Pain in Major  
461 Limb Amputees: A Randomized Clinical Trial. *Ann Surg* 270, 238-246.
- 462 Farina, D., Vujaklija, I., Sartori, M., Kapelner, T., Negro, F., Jiang, N., Bergmeister, K., Andalib, A.,  
463 Principe, J., and Aszmann, O.C. (2017). Man/machine interface based on the discharge  
464 timings of spinal motor neurons after targeted muscle reinnervation. *Nature Biomedical*  
465 *Engineering* 1, 0025.
- 466 Gesslbauer, B., Hruby, L.A., Roche, A.D., Farina, D., Blumer, R., and Aszmann, O.C. (2017).  
467 Axonal components of nerves innervating the human arm. *Annals of Neurology* 82, 396-408.
- 468 Guillen, J. (2012). FELASA guidelines and recommendations. *J Am Assoc Lab Anim Sci* 51, 311-  
469 321.
- 470 Hayashi, A., Moradzadeh, A., Hunter, D., Kawamura, D., Puppala, V., Tung, T., Mackinnon, S., and  
471 Myckatyn, T. (2007). Retrograde Labeling in Peripheral Nerve Research: It Is Not All Black  
472 and White. *Journal of Reconstructive Microsurgery* 23, 381-389.
- 473 Inciong, J.G., Marrocco, W.C., and Terzis, J.K. (2000). Efficacy of intervention strategies in a  
474 brachial plexus global avulsion model in the rat. *Plast Reconstr Surg* 105, 2059-2071.
- 475 Kapelner, T., Jiang, N., Holobar, A., Vujaklija, I., Roche, A.D., Farina, D., and Aszmann, O.C.  
476 (2016). Motor Unit Characteristics after Targeted Muscle Reinnervation. *PLOS ONE* 11,  
477 e0149772.
- 478 Kuiken, T.A., Childress, D.S., and Zev Rymer, W. (1995). The hyper-reinnervation of rat skeletal  
479 muscle. *Brain Research* 676, 113-123.
- 480 Kuiken, T.A., Li, G., Lock, B.A., Lipschutz, R.D., Miller, L.A., Stubblefield, K.A., and Englehart,  
481 K.B. (2009). Targeted muscle reinnervation for real-time myoelectric control of multifunction  
482 artificial arms. *Jama* 301, 619-628.
- 483 Mackinnon, S.E., and Novak, C.B. (1999). Nerve transfers. New options for reconstruction following  
484 nerve injury. *Hand Clin* 15, 643-666, ix.
- 485 Mioton, L.M., Dumanian, G.A., Shah, N., Qiu, C.S., Ertl, W.J., Potter, B.K., Souza, J.M., Valerio,  
486 I.L., Ko, J.H., and Jordan, S.W. (2020). Targeted Muscle Reinnervation Improves Residual



- 487 Limb Pain, Phantom Limb Pain, and Limb Function: A Prospective Study of 33 Major Limb  
488 Amputees. *Clin Orthop Relat Res* 478, 2161-2167.
- 489 Muceli, S., Bergmeister, K.D., Hoffmann, K.P., Aman, M., Vukajlija, I., Aszmann, O.C., and Farina,  
490 D. (2019a). Decoding motor neuron activity from epimysial thin-film electrode recordings  
491 following targeted muscle reinnervation. *J Neural Eng* 16, 016010.
- 492 Muceli, S., Poppendieck, W., Hoffmann, K.P., Dosen, S., Benito-Leon, J., Barroso, F.O., Pons, J.L.,  
493 and Farina, D. (2019b). A thin-film multichannel electrode for muscle recording and  
494 stimulation in neuroprosthetics applications. *J Neural Eng* 16, 026035.
- 495 Muceli, S., Poppendieck, W., Negro, F., Yoshida, K., Hoffmann, K.P., Butler, J.E., Gandevia, S.C.,  
496 and Farina, D. (2015). Accurate and representative decoding of the neural drive to muscles in  
497 humans with multi-channel intramuscular thin-film electrodes. *J Physiol* 593, 3789-3804.
- 498 Oberlin, C., Béal, D., Leechavengvongs, S., Salon, A., Dauge, M.C., and Sarcy, J.J. (1994). Nerve  
499 transfer to biceps muscle using a part of ulnar nerve for C5-C6 avulsion of the brachial  
500 plexus: anatomical study and report of four cases. *J Hand Surg Am* 19, 232-237.
- 501 Percie Du Sert, N., Hurst, V., Ahluwalia, A., Alam, S., Avey, M.T., Baker, M., Browne, W.J., Clark,  
502 A., Cuthill, I.C., Dirnagl, U., Emerson, M., Garner, P., Holgate, S.T., Howells, D.W., Karp,  
503 N.A., Lazic, S.E., Lidster, K., Maccallum, C.J., Macleod, M., Pearl, E.J., Petersen, O.H.,  
504 Rawle, F., Reynolds, P., Rooney, K., Sena, E.S., Silberberg, S.D., Steckler, T., and Würbel,  
505 H. (2020). The ARRIVE guidelines 2.0: Updated guidelines for reporting animal research.  
506 *PLOS Biology* 18, e3000410.
- 507 Ray, W.Z., Chang, J., Hawasli, A., Wilson, T.J., and Yang, L. (2016). Motor Nerve Transfers.  
508 *Neurosurgery* 78, 1-26.
- 509 Salminger, S., Sturma, A., Hofer, C., Evangelista, M., Perrin, M., Bergmeister, K.D., Roche, A.D.,  
510 Hasenoehrl, T., Dietl, H., Farina, D., and Aszmann, O.C. (2019). Long-term implant of  
511 intramuscular sensors and nerve transfers for wireless control of robotic arms in above-elbow  
512 amputees. *Science Robotics* 4, eaaw6306.
- 513 Scholz, T., Krichevsky, A., Sumarto, A., Jaffurs, D., Wirth, G., Paydar, K., and Evans, G. (2009).  
514 Peripheral Nerve Injuries: An International Survey of Current Treatments and Future  
515 Perspectives. 25, 339-344.
- 516 Terzis, J.K., and Papakonstantinou, K.C. (2000). The surgical treatment of brachial plexus injuries in  
517 adults. *Plast Reconstr Surg* 106, 1097-1122; quiz 1123-1094.



518 Van Zyl, N., Hill, B., Cooper, C., Hahn, J., and Galea, M.P. (2019). Expanding traditional tendon-  
519 based techniques with nerve transfers for the restoration of upper limb function in tetraplegia:  
520 a prospective case series. *The Lancet* 394, 565-575.

521 **12 Rich Media**

522 Video 1: Grooming behavior 12 weeks following double nerve transfer in the right upper limb.

523 Video 2: Muscle response upon crushing the motor branch of the long head of the biceps.

524 Video 3: Muscle response upon ulnar nerve crush following double nerve transfer.

525 Video 4: Muscle response upon anterior interosseus nerve crush following double nerve transfer.
